# Supplementary material for: Cancer-Associated Fibroblasts Exposed to High-Dose Ionizing Radiation Promote M2 Polarization of Macrophages, Which Induce Radiosensitivity in Cervical Cancer
Source: MDPI journal article supplement (doi:10.3390/cancers15051620), 2023-03-06
Supplement: s1 [file s1]

Table S1. M2 macrophages and clinicopathological features of cervical cancer

|                             | Low M2<br>n=79 | High M2<br>n=72 | t/ $\chi^2$ | P     |
|-----------------------------|----------------|-----------------|-------------|-------|
| <b>Age</b>                  | 57.63±9.83     | 59.15±9.03      | -0.990      | 0.828 |
| <b>Tumor size &gt; 4cm</b>  | 46 (58.2%)     | 50 (69.4%)      | 2.047       | 0.153 |
| <b>Lymph node positive</b>  | 17 (21.5%)     | 26 (36.1%)      | 3.938       | 0.047 |
| <b>Distant metastasis</b>   | 9 (11.4%)      | 11 (15.3%)      | 0.495       | 0.482 |
| <b>FIGO (2009)</b>          |                |                 |             |       |
| IA-IIA                      | 13 (16.5%)     | 7 (9.7%)        | 1.486       | 0.223 |
| IIB-V                       | 66 (83.5%)     | 65 (90.3%)      |             |       |
| <b>Pathological pattern</b> |                |                 |             |       |
| adenocarcinoma              | 3 (3.8%)       | 8 (11.1%)       | 2.983       | 0.084 |
| squamous carcinoma          | 76 (96.2%)     | 64 (88.9%)      |             |       |
