# Supplementary figures and images for: Cancer-Associated Fibroblasts Exposed to High-Dose Ionizing Radiation Promote M2 Polarization of Macrophages, Which Induce Radiosensitivity in Cervical Cancer
Source: MDPI journal article supplement (doi:10.3390/cancers15051620), 2023-03-06

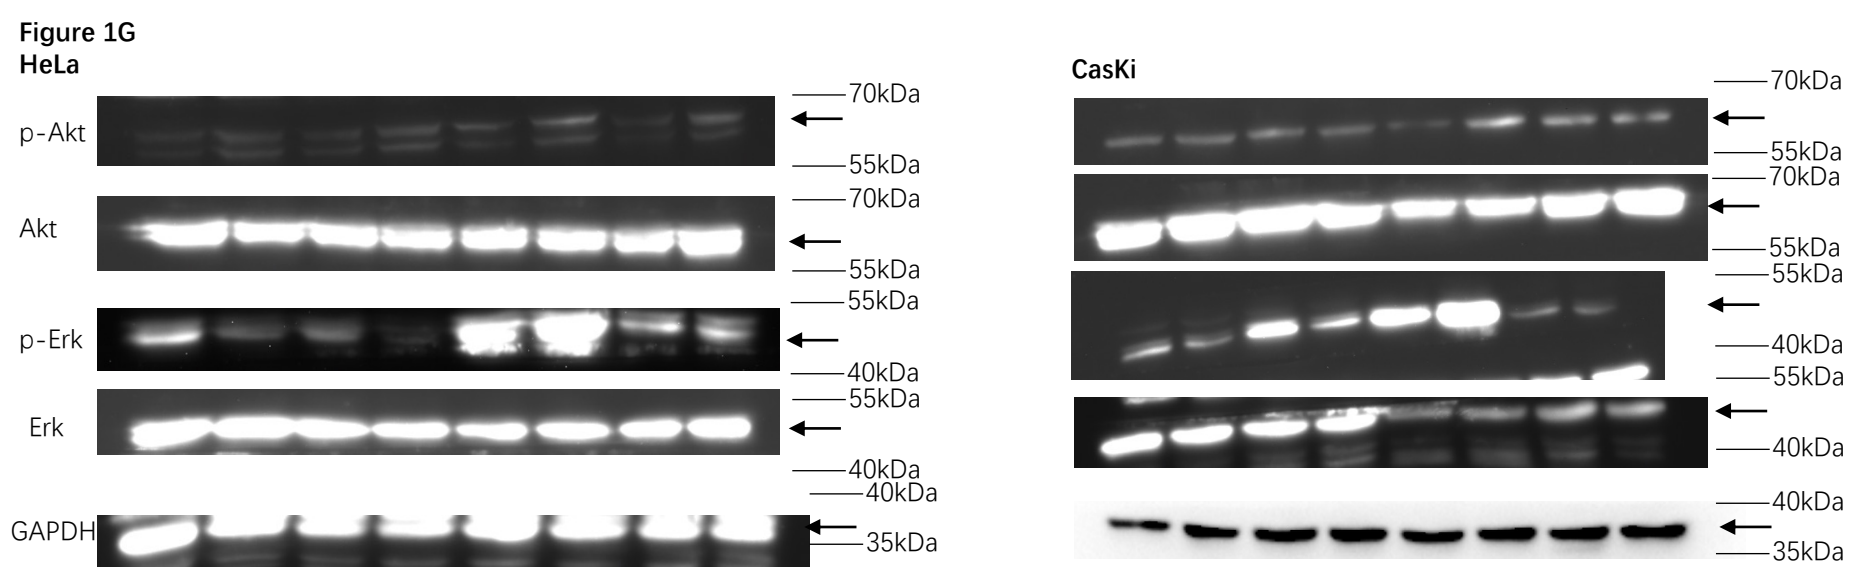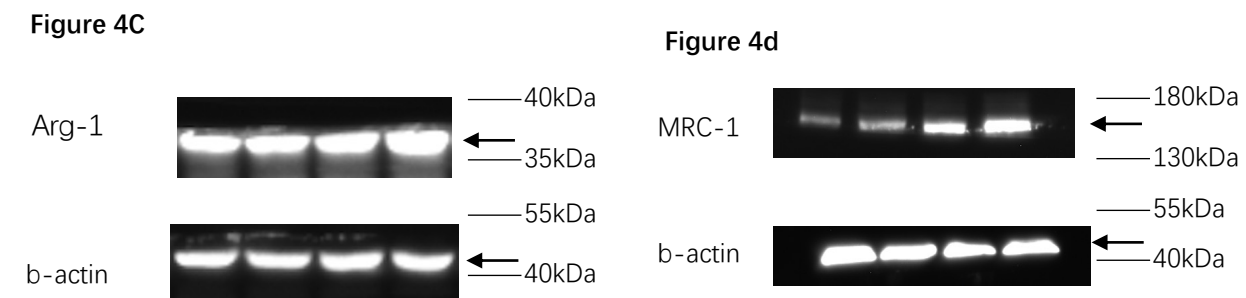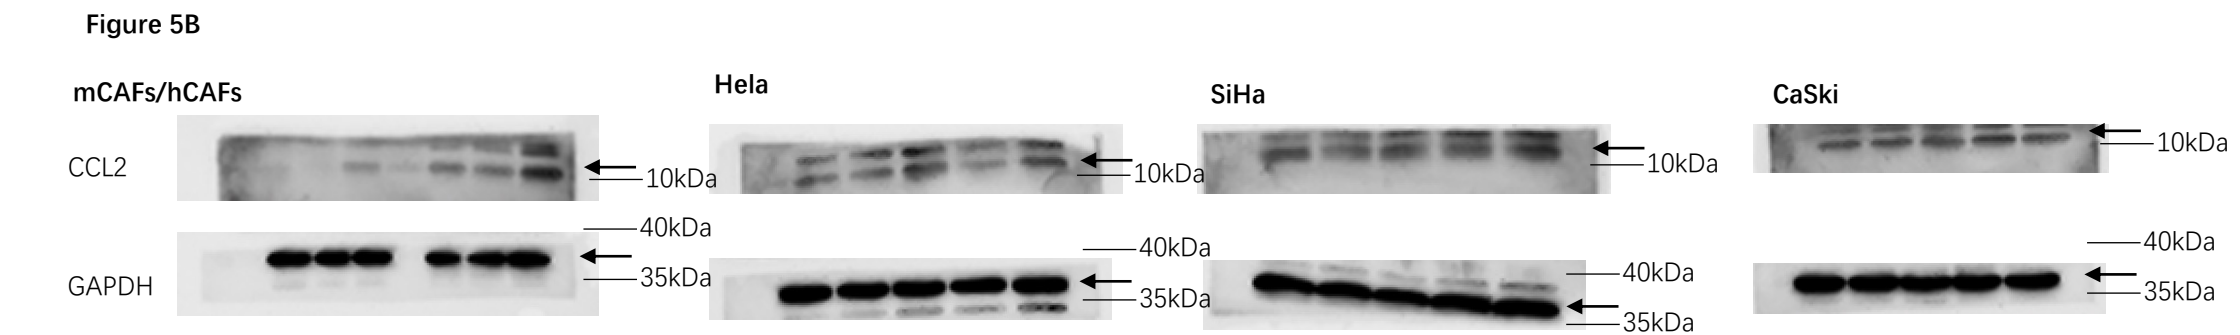

Supplement: s1 [file s1]
